# Supplementary material
Source: PubMed Central journal article supplement (PMC6357966)
Supplement: NIHMS1517154-supplement-Table_S1.pdf [file NIHMS1517154-supplement-Table_S1.pdf]

Supplemental Table 1: Antibodies used in this study

| <b>Antibody</b>                   | <b>Clone Number</b> | <b>Application</b> | <b>Source</b>  |
|-----------------------------------|---------------------|--------------------|----------------|
| Anti-mouse IgM                    | II/41               | Flow cytometry     | eBioscience    |
| Anti-mouse IgG1                   | A85-1               | Flow cytometry     | BD             |
| Anti-mouse IgE                    | R35-72              | Flow cytometry     | BD             |
| Anti-mouse B220                   | RA3-6B2             | Flow cytometry     | BD             |
| Anti-mouse CD90.1 (Thy1.1)        | HIS51               | FACS               | eBioscience    |
| Purified anti-mouse IgM           | II/41               | ELISA              | BD             |
| Biotin anti-mouse IgM             | II/41               | ELISA              | BD             |
| Purified anti-mouse IgG1          | A85-3               | ELISA              | BD             |
| Biotin anti-mouse IgG1            | A85-1               | ELISA              | BD             |
| Rat anti-mouse B220               | RA3-6B2             | IHC                | eBioscience    |
| Rabbit anti-mouse GFP             | Polyclonal          | IHC                | ThermoFisher   |
| Rabbit anti-mouse RFP             | Polyclonal          | IHC                | ROCKLAND       |
| Goat anti-Rabbit Oregon Green 488 | Polyclonal          | IHC                | ThermoFisher   |
| Goat anti-Rabbit Alexa Flour 594  | Polyclonal          | IHC                | ThermoFisher   |
| Rabbit anti-mouse BATF            | D7C5                | Immunoblotting     | Cell Signaling |
| Rabbit anti-mouse AID             | 30F12               | Immunoblotting     | Cell Signaling |
| Rabbit anti-mouse NFIL3           | D5K8O               | Immunoblotting     | Cell Signaling |
| Rabbit anti-mouse WNT10A          | ab106522            | Immunoblotting     | Abcam          |
| Rabbit anti-mouse IRF4            | H-140               | Immunoblotting     | Santa Cruz     |
| Rabbit anti-mouse PAX5            | D19F8               | Immunoblotting     | Cell Signaling |
| Rabbit anti-mouse HSP90           | H-114               | Immunoblotting     | Santa Cruz     |
