# Supplementary material
Source: PubMed Central journal article supplement (PMC6357966)
Supplement: NIHMS1517154-supplement-Table_S2.pdf [file NIHMS1517154-supplement-Table_S2.pdf]

## Supplemental Table 2: Primers used for RT-qPCR

|                               | <b>Forward Primer</b>                  | <b>Reverse Primer</b>                     |
|-------------------------------|----------------------------------------|-------------------------------------------|
| $\beta$ -actin                | Qiagen QT00095242                      |                                           |
| Batf                          | Sense, 5'-GTTCTGTTTCTCCAGGTCC-3'       | antisense, 5'-GAAGAATCGCATCGCTGC-3'       |
| Aicda                         | Sense, 5'-TGCTACGTGGTGAAGAGGAG-3'      | antisense, 5'-TCCCAGTCTGAGATGTAGCG-3'     |
| Pax5                          | Sense, 5'-AGTCTCCAGTGCCGAATG-3'        | antisense, 5'-TCCGTGGTGGTGAAGATG-3'       |
| Irf4                          | Sense, 5'-GGACTACAATCGTGAGGAGGAC-3'    | antisense, 5'-ACGTCACAGGACATTGATATGG-3'   |
| Bcl6                          | Sense, 5'-TCGTGAGGTCGTGGAGAAC-3'       | antisense, 5'-AGAGAAGAGGAAGGTGCTGAG-3'    |
| Prdm1                         | Sense, 5'-AACACGTGGTACAACCCAAAG-3'     | antisense, 5'-AGGCTGCAGAGATGGATGTAG-3'    |
| Pou2af1                       | Sense, 5'-ACCAGGGTGTTTCGAGTAAG-3'      | antisense, 5'-CCTCTGTCACTGTGGAAGCA-3'     |
| Nfil3                         | Sense, 5'-AAGATTGGTCCCTCAAATCG         | antisense, 5'-TCGGTTGTGTGGCTATGAAT        |
| Wnt10a                        | Sense, 5'-ATGAGTGCCAGCATCAGTTC         | antisense, 5'-ACCGCAAGCCTTCAGTTTAC        |
| GL I $\mu$ -C $\mu$           | Sense, 5'-ACCTGGGAATGTATGGTTGTGGCTT-3' | antisense, 5'-TCTGAACCTTCAAGGATGCTCTTG-3' |
| GL I $\gamma$ 1-C $\gamma$ 1  | Sense, 5'-GGCCCTTCCAGATCTTTGAG-3'      | antisense, 5'-ATGGAGTTAGTTTGGGCAGCA-3'    |
| GL I $\epsilon$ -C $\epsilon$ | Sense, 5'-CACATCCACAGGCACCAAAT-3'      | antisense, 5'-ATCACCGGCTCCGGAAGTA-3'      |
| miR155                        | Qiagen MS00031486                      |                                           |
| RNU6                          | Qiagen MS00033740                      |                                           |
