# Supplementary material
Source: PubMed Central journal article supplement (PMC6357966)
Supplement: NIHMS1517154-supplement-Table_S3.pdf [file NIHMS1517154-supplement-Table_S3.pdf]

### Supplemental Table 3: Primers used for ChIP-qPCR

|                 | <b>Forward Primer</b>              | <b>Reverse Primer</b>                   |
|-----------------|------------------------------------|-----------------------------------------|
| ChIP Myb (N)    | Sense, 5'-CATGCACTCAGAGACAGAG-3'   | antisense, 5'-GCAAATCATTCAAACGCCGC-3'   |
| ChIP Myb (E)    | Sense, 5'-GCTGGAGGCATGCTGTAAG-3'   | antisense, 5'-GCCATTTTGCCTCACAACC-3'    |
| Nfil3 (A)       | Sense, 5'-ATGTCTCCATCCTTGAAGTG-3'  | antisense, 5'-GCTTGCATTTTCTGTCTTTT-3'   |
| Nfil3 (B)       | Sense, 5'-TGGTTTTTGGAGACGTTTTCT-3' | antisense, 5'-GTTTAATCCCCAAAGCCTAT-3'   |
| Nfil3 (C)       | Sense, 5'-CAAGGGCTTTATCATCTGAG-3'  | antisense, 5'-CCATCTGTGAGCTACTCTCC-3'   |
| ChIP Bic (A)    | Sense, 5'-GGTCCTAAAGGGAACCCACAG-3' | antisense, 5'-TGCTGTTTCCTGTTAGAGTTGG-3' |
| ChIP Bic (B)    | Sense, 5'-AGGTCAAAGGCAACCAAAG-3'   | antisense, 5'-TGGATTTCCCACCAGAATTT-3'   |
| ChIP Wnt10a (A) | Sense, 5'-TTAATGAGAGTGGGAGCCGG-3'  | antisense, 5'-CCCCAGCAGAACCCAAGG-3'     |
| ChIP Wnt10a (B) | Sense, 5'-TGCTCAATGGTTAAGGGCAC-3'  | antisense, 5'-AGAGCCAAAACATGATGCCG-3'   |
